# Supplementary material for: Biomolecule-assisted synthesis of porous network-like Ni3S2 nanoarchitectures assembled with ultrathin nanosheets as integrated negative electrodes for high-performance lithium storage
Source: Royal Society of Chemistry journal article supplement (doi:10.1039/d0nj02890h), 2020-01-01
Supplement: d0nj02890h1.pdf [file d0nj02890h1.pdf]

Electronic Supplementary Material (ESI) for New Journal of Chemistry.

## Supporting Information

Biomolecule-assisted synthesis of porous network-like Ni<sub>3</sub>S<sub>2</sub>  
nanoarchitectures assembled with ultrathin nanosheets as  
integrated negative electrodes for high-performance lithium  
storage

Bo Wang,<sup>\*a</sup> Yue Li,<sup>a</sup> Kun Liu,<sup>a</sup> Jinhui Zhang,<sup>a</sup> and Xiaoyu Wu,<sup>\*b</sup>

<sup>a</sup> Department of Environmental and Chemical Engineering, Tangshan University,  
Tangshan 063000, P. R. China.

<sup>b</sup> *Department of Chemistry, Southern University of Science and Technology  
(SUSTech), Shenzhen, 518055, P. R. China*

\* Corresponding author. Tel: +86-315-2010649; Fax: +86-315-2010649.

E-mail address: [wangbo@buaa.edu.cn](mailto:wangbo@buaa.edu.cn).

E-mail address: [wuxy3@sustech.edu.cn](mailto:wuxy3@sustech.edu.cn).

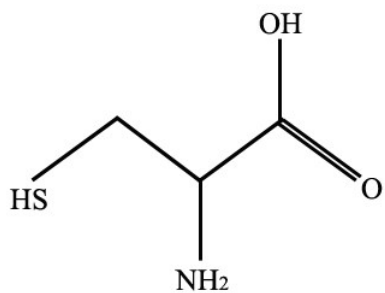

**Fig. S1** Chemical structure of L-cysteine.

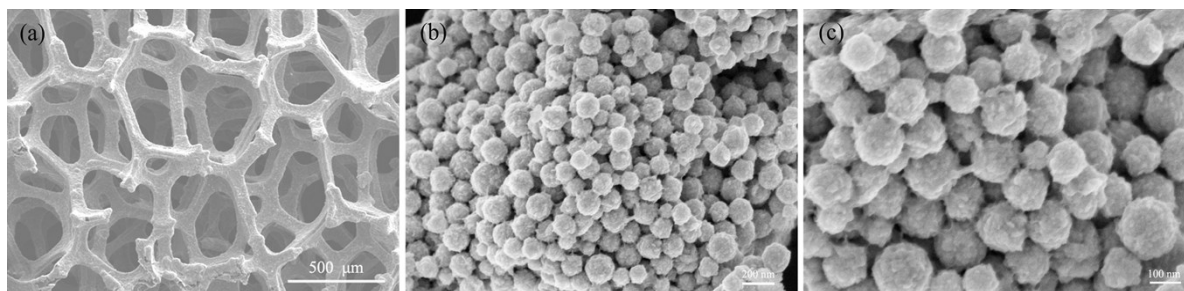

**Fig. S2** SEM images of the (a) bare NF and (b and c) as-prepared Ni<sub>3</sub>S<sub>2</sub> powders at different magnifications.

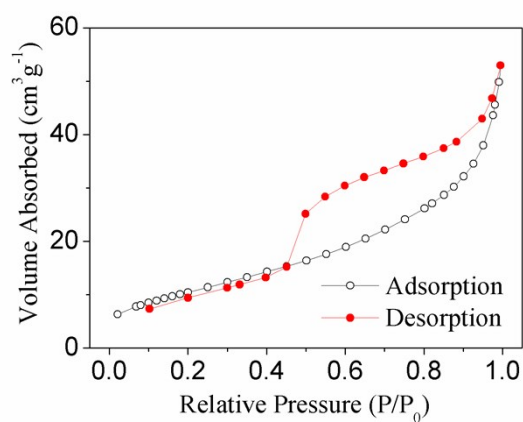

**Fig. S3** N<sub>2</sub> adsorption-desorption isotherms of the as-prepared Ni<sub>3</sub>S<sub>2</sub>@NF composites.

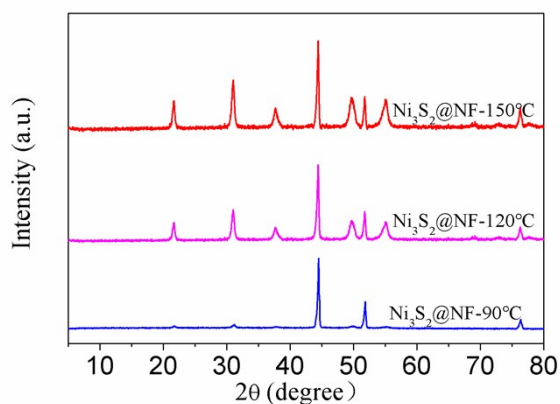

**Fig. S4** XRD pattern of the as-prepared  $\text{Ni}_3\text{S}_2@\text{NF}$  composites under different reaction temperatures.

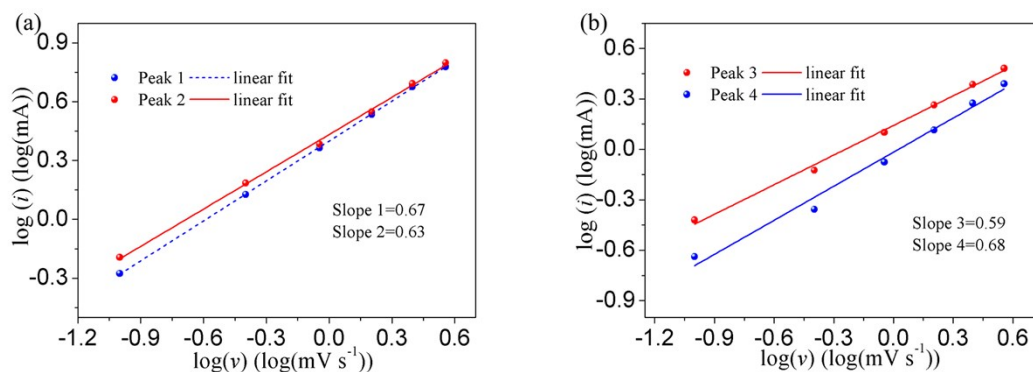

**Fig. S5** The relationship between  $\log(i)$  and  $\log(v)$  of (a)  $\text{Ni}_3\text{S}_2@\text{NF}$  and (b)  $\text{Ni}_3\text{S}_2$  powder pasted electrodes.

**Table S1** The elemental composition of the  $\text{Ni}_3\text{S}_2@\text{NF}$  composites from the EDS (Fig. 3f) .

| <i>Element</i> | <i>Weight %</i> | <i>Atomic %</i> |
|----------------|-----------------|-----------------|
| <i>C K</i>     | 06.47           | 09.15           |
| <i>O K</i>     | 03.44           | 06.50           |
| <i>Ni K</i>    | 67.64           | 51.22           |
| <i>S K</i>     | 22.45           | 33.13           |

**Table S2.** Comparison of electrochemical performance of the Ni<sub>3</sub>S<sub>2</sub>@NF in this work with some other Ni<sub>3</sub>S<sub>2</sub>-based electrodes reported in recent literature.

| Type of material                                                                | Initial reversible specific capacity                | Specific capacity after cycling             | Capacity retention                        | Reference |
|---------------------------------------------------------------------------------|-----------------------------------------------------|---------------------------------------------|-------------------------------------------|-----------|
| Ni <sub>3</sub> S <sub>2</sub> /C fibers                                        | 550 mAh g <sup>-1</sup> at 50 mA g <sup>-1</sup>    | 421.4 mAh g <sup>-1</sup> after 50 cycles   | 35.7% from 200 to 2000 mA g <sup>-1</sup> | 1         |
| Electrodeposition of Ni <sub>3</sub> S <sub>2</sub> /Ni <sub>4</sub> composites | 338 mAh g <sup>-1</sup> at 170 mA g <sup>-1</sup>   | 322 mAh g <sup>-1</sup> after 100 cycles    | ~60% from 170 to 1700 mA g <sup>-1</sup>  | 2         |
| Ni <sub>3</sub> S <sub>2</sub> @N-doped carbon core/shell arrays                | 420 mAh g <sup>-1</sup> at 100 mA g <sup>-1</sup>   | 368 mAh g <sup>-1</sup> after 100 cycles    | 91.6% from 100 to 2000 mA g <sup>-1</sup> | 3         |
| 3D porous Ni <sub>3</sub> S <sub>2</sub> electrode                              | 593 mAh g <sup>-1</sup> at 150 mA g <sup>-1</sup>   | 622 mAh g <sup>-1</sup> after 55 cycles     | 73% from 150 to 1200 mA g <sup>-1</sup>   | 4         |
| Ni <sub>3</sub> S <sub>2</sub> nanoslices anchored on reduced graphene oxide    | 608.4 mAh g <sup>-1</sup> at 100 mA g <sup>-1</sup> | 465 mAh g <sup>-1</sup> after 100 cycles    | 67.2% from 100 to 1000 mA g <sup>-1</sup> | 5         |
| Porous Ni <sub>3</sub> S <sub>2</sub> nanosheets Network grown on NF            | 987.8 mAh g <sup>-1</sup> at 200 mA g <sup>-1</sup> | 569.86 mAh g <sup>-1</sup> after 300 cycles | 45.4% from 200 to 3200 mA g <sup>-1</sup> | This work |

## References

- 1 T. Du, H. Zhu, B. B. Xu, C. Liang, M. Yan, and Y. Z. Jiang, *ACS Appl. Energy Mater.*, 2019, **2**, 4421.
- 2 C. W. Su, J. -M. Li, W. Yang, and J. -M. Guo, *J. Phys. Chem. C*. 2014, **118**, 767.
- 3 Z. J. Yao, L. M. Zhou, H. Y. Yin, X. L. Wang, D. Xie, X. H. Xia, C. D. Gu, and J. P. Tu, *Small*, 2019, **15**, 1904433.
- 4 J. S. Zhu, and G. Z. Hu. *Mater. Lett.* 2016,**166**, 307.
- 5 P. Yu, L. Wang, J. Q. Wang, D. D. Zhao, C. G. Tian, L. Zhao, and H. T. Yu, *RSC Adv.*, 2016, **6**, 48083.
